# Supplementary material for: Everolimus Rescues the Phenotype of Elastin Insufficiency in Patient Induced Pluripotent Stem Cell–Derived Vascular Smooth Muscle Cells
Source: PubMed Central journal article supplement — Arterioscler Thromb Vasc Biol. 2020 Mar 26;40(5):1325–39. doi: 10.1161/ATVBAHA.119.313936 (PMC7176340; doi:10.1161/atvbaha.119.313936), 2020-03-26
Supplement: atv-40-1325-s001.pdf [file atv-40-1325-s001.pdf]

Kinnear et al. Everolimus rescues the phenotype of elastin insufficiency in patient iPSC-derived vascular smooth muscle cells

## **SUPPLEMENTAL MATERIALS**

### **Everolimus rescues the phenotype of elastin insufficiency in patient iPSC-derived vascular smooth muscle cells**

Caroline Kinnear<sup>1</sup>, Rahul Agrawal<sup>1</sup>, Caitlin Loo<sup>2,3</sup>, Aric Pahnke<sup>4,5</sup>, Deivid de Carvalho Rodrigues<sup>2</sup>, Tadeo Thompson<sup>2</sup>, Oyediran Akinrinade<sup>1</sup>, Samad Ahadian<sup>4,5</sup>, Fred Keeley<sup>6,7</sup>, Milica Radisic<sup>4,5</sup>, Seema Mital\*<sup>1,8</sup> and James Ellis\*<sup>2,3</sup>,

Running title: Drug screening in elastin deficient patient iPSCs

<sup>1</sup>Program in Genetics and Genome Biology, The Hospital for Sick Children, Toronto, Ontario, Canada

<sup>2</sup>Program in Developmental & Stem Cell Biology, The Hospital for Sick Children, Toronto, Ontario, Canada

<sup>3</sup>Department of Molecular Genetics, University of Toronto, Toronto, Ontario, Canada

<sup>4</sup>Institute of Biomaterials and Biomedical Engineering, University of Toronto, Toronto, Ontario, Canada

<sup>5</sup>Department of Chemical Engineering and Applied Chemistry, University of Toronto, Toronto, Ontario, Canada

<sup>6</sup>Program in Molecular Medicine, The Hospital for Sick Children, Toronto, Ontario, Canada

<sup>7</sup>Department of Biochemistry, University of Toronto, Toronto, Ontario, Canada

<sup>8</sup>Department of Pediatrics, The Hospital for Sick Children, University of Toronto, Toronto, Ontario, Canada

## Major Resources Table

### Antibodies

| Target antigen   | Vendor or Source         | Catalog #     | Working concentration |
|------------------|--------------------------|---------------|-----------------------|
| AFP              | R&D Systems              | MAB1368       | 1:200                 |
| NANOG            | Cell Signaling           | 4903P         | 1:400                 |
| Nestin           | Millipore                | MAB5326       | 1:200                 |
| OCT4             | Abcam                    | Ab19857       | 1:200                 |
| SMA              | Thermo Fisher Scientific | 18-0106 (1A4) | 1:200                 |
| SM22 $\alpha$    | Abcam                    | Ab14106       | 1:200                 |
| SSEA4            | Thermo Fisher Scientific | 41-4000       | 1:100                 |
| TRA-1-60         | Thermo Fisher Scientific | 40-1000       | 1:100                 |
| TUBB3            | Chemicon                 | MAB1637       | 1:200                 |
| Goat anti-mouse  | Thermo Fisher Scientific | 11001         | 1:500                 |
| Goat anti-rabbit | Thermo Fisher Scientific | 11008         | 1:500                 |

Antibody validation provided in manufacturers data sheets:

AFP: <https://resources.rndsystems.com/pdfs/datasheets/mab1368.pdf>

NANOG: <https://media.cellsignal.com/pdf/4903.pdf>

Nestin: [https://www.emdmillipore.com/CA/en/product/Anti-Nestin-Antibody-clone-10C2,MM\\_NF-MAB5326?ReferrerURL=https%3A%2F%2Fwww.google.com%2F#overview](https://www.emdmillipore.com/CA/en/product/Anti-Nestin-Antibody-clone-10C2,MM_NF-MAB5326?ReferrerURL=https%3A%2F%2Fwww.google.com%2F#overview)

OCT4: <https://www.abcam.com/oct4-antibody-chip-grade-ab19857.html#top-100>

SMA: <https://www.thermofisher.com/content/dam/LifeTech/Documents/PDFs/PG1485-PJ8781-CO36961-Handbook3StemCells-Global-smaller.pdf>

SM22 $\alpha$ : <https://www.abcam.com/tagIntransgelin-antibody-ab14106.html>

SSEA4: [https://www.thermofisher.com/order/genome-database/dataSheetPdf?producttype=antibody&productsubtype=antibody\\_primary&productId=41-4000&version=98](https://www.thermofisher.com/order/genome-database/dataSheetPdf?producttype=antibody&productsubtype=antibody_primary&productId=41-4000&version=98)

TRA-1-60: [https://www.thermofisher.com/order/genome-database/dataSheetPdf?producttype=antibody&productsubtype=antibody\\_primary&productId=41-1000&version=98](https://www.thermofisher.com/order/genome-database/dataSheetPdf?producttype=antibody&productsubtype=antibody_primary&productId=41-1000&version=98)

TUBB3: [https://www.emdmillipore.com/CA/en/product/Anti-Tubulin-Antibody-beta-III-isoform-CT-clone-TU-20-Similar-to-TUJ1,MM\\_NF-MAB1637](https://www.emdmillipore.com/CA/en/product/Anti-Tubulin-Antibody-beta-III-isoform-CT-clone-TU-20-Similar-to-TUJ1,MM_NF-MAB1637)

Goat anti-mouse: [https://www.thermofisher.com/order/genome-database/dataSheetPdf?producttype=antibody&productsubtype=antibody\\_secondary&productId=A-11001&version=98](https://www.thermofisher.com/order/genome-database/dataSheetPdf?producttype=antibody&productsubtype=antibody_secondary&productId=A-11001&version=98)

Goat anti-rabbit: [https://www.thermofisher.com/order/genome-database/dataSheetPdf?producttype=antibody&productsubtype=antibody\\_secondary&productId=A-11008&version=98](https://www.thermofisher.com/order/genome-database/dataSheetPdf?producttype=antibody&productsubtype=antibody_secondary&productId=A-11008&version=98)

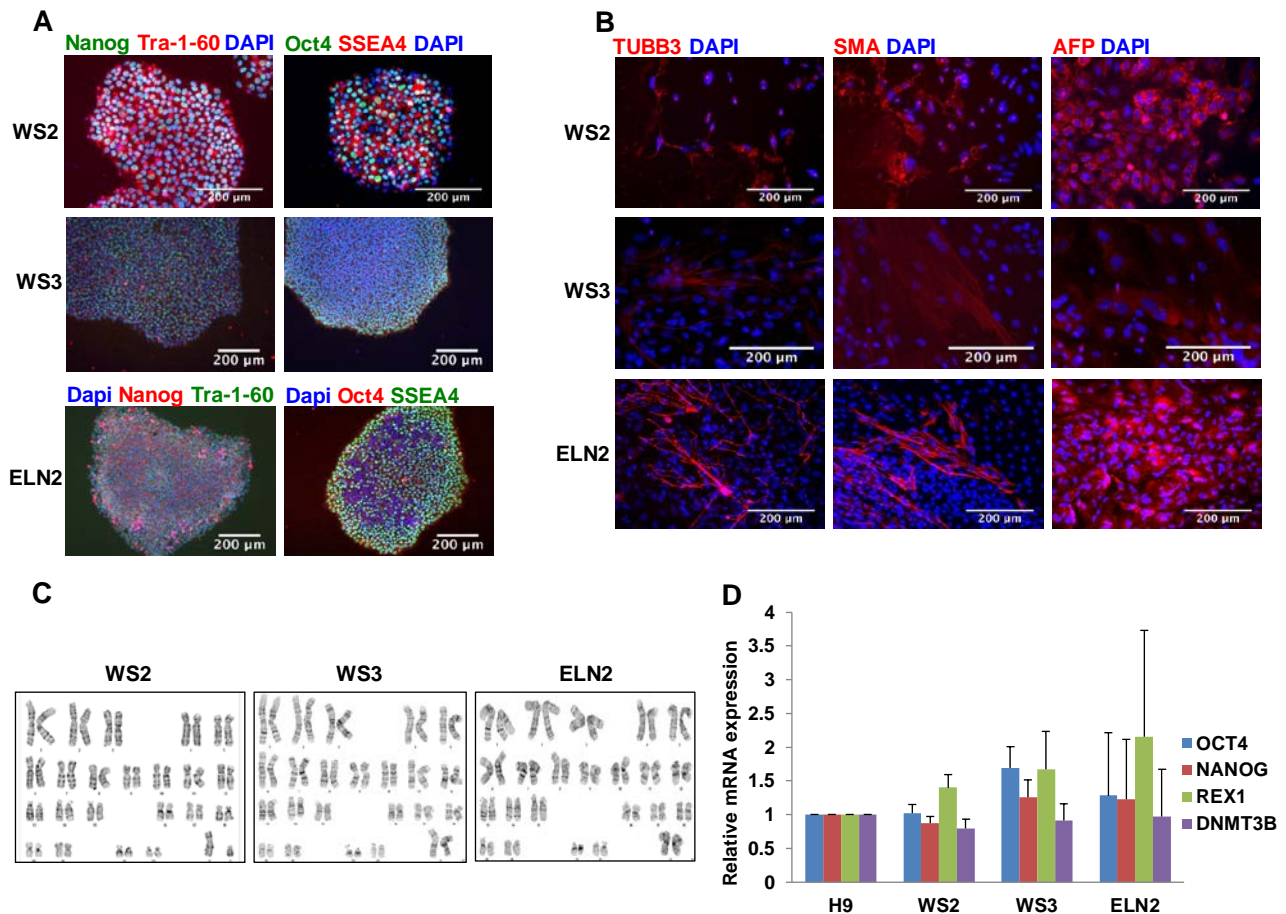

**Figure I.** Pluripotency characterization of WS2, WS3, and ELN2 iPSCs. (A) iPSCs expressed pluripotency markers NANOG, TRA-1-60, OCT4 and SSEA4. Nuclei were stained with DAPI. (B) iPSCs differentiated in vitro into all three germ layers. Images show TUBB3 staining for neuronal ectoderm, SMA expression as mesoderm, and AFP expression as endoderm. (C) Normal G banding karyotype of the iPSCs. (D) Endogenous pluripotency genes were upregulated following successful reprogramming in H9 and patient iPS cells.

WS, Williams syndrome; ELN, elastin; OCT4, octamer-binding transcription factor 4; DAPI, 4',6'-diamidino-2-phenylindole; TUBB3, tubulin  $\beta$ 3; SMA, smooth muscle actin, AFP,  $\alpha$ -fetoprotein.

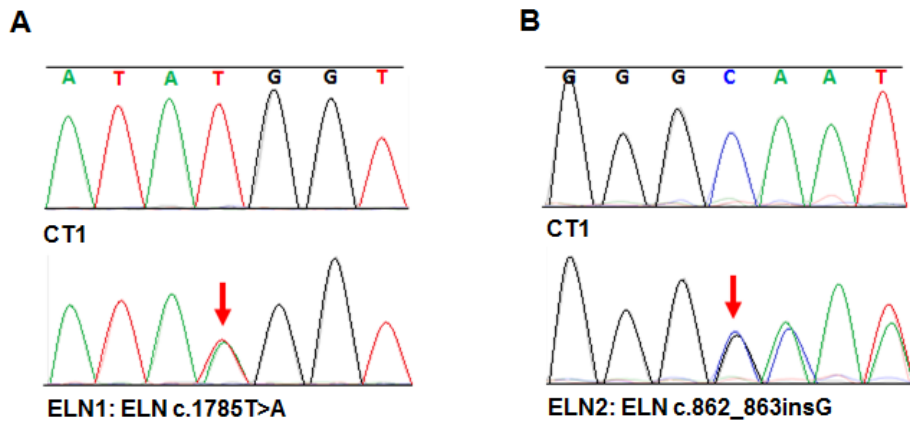

**Figure II.** Mutation confirmation. (A-B): Chromatographs of control iPSC-SMCs (CT1), heterozygous ELN1 variant (c.1785T>A) and heterozygous ELN2 variant (c.862\_863insG). ELN, elastin.

Kinnear et al. Everolimus rescues the phenotype of elastin insufficiency in patient iPSC-derived vascular smooth muscle cells

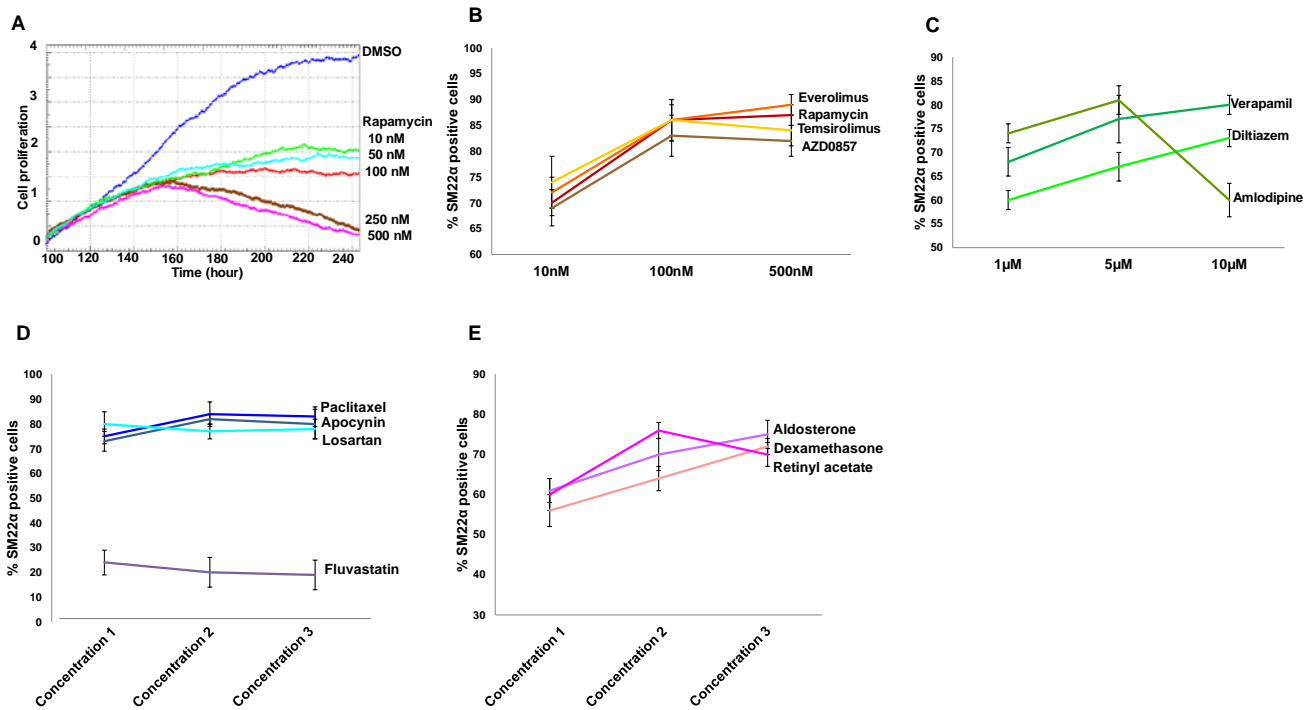

**Figure III. Selection of optimal dose for drug assays.** (A) xCELLigence graph shows dose-dependent change in cell impedance i.e. SMC proliferation over time in WS patient SMCs with DMSO (blue) and 10-500nM rapamycin. 250nM and 500nM doses induced cytotoxicity. 100nM rapamycin showed greatest effect on proliferation without cytotoxicity. (B) mTOR inhibitors: % of SM22α cells i.e. SMC differentiation showed a dose-dependent increase on treatment with 10-500nM doses of 4 mTOR inhibitors. 100nM dose provided greatest increase after which the effect plateaued. (C) Calcium channel blockers: % of SM22α cells i.e. SMC differentiation showed a dose-dependent increase on treatment with 1-10μM doses of 3 calcium channel blockers. 10μM was chosen as the optimal dose for verapamil and diltiazem and 5 μM for amlodipine which was the maximum tolerated dose. (D) SMC differentiation showed a dose-dependent increase on treatment with paclitaxel (10, 50, 100nM) and apocynin (1, 5, 10μM), but no clear dose response with losartan (1, 5, 10μM). Fluvastatin induced cell toxicity at all doses tested (0.25, 0.5, 1 μM). (E) SMC differentiation showed a dose-dependent increase on treatment with aldosterone (10, 50, 100nM), dexamethasone (10, 50, 100nM), and retinyl acetate (0.1, 1, 10μM). (n=3 technical replicates for each drug). SMC, smooth muscle cells; WS, Williams syndrome; DMSO, Dimethyl sulfoxide; mTOR, mammalian target of rapamycin; CCB, calcium channel blocker.

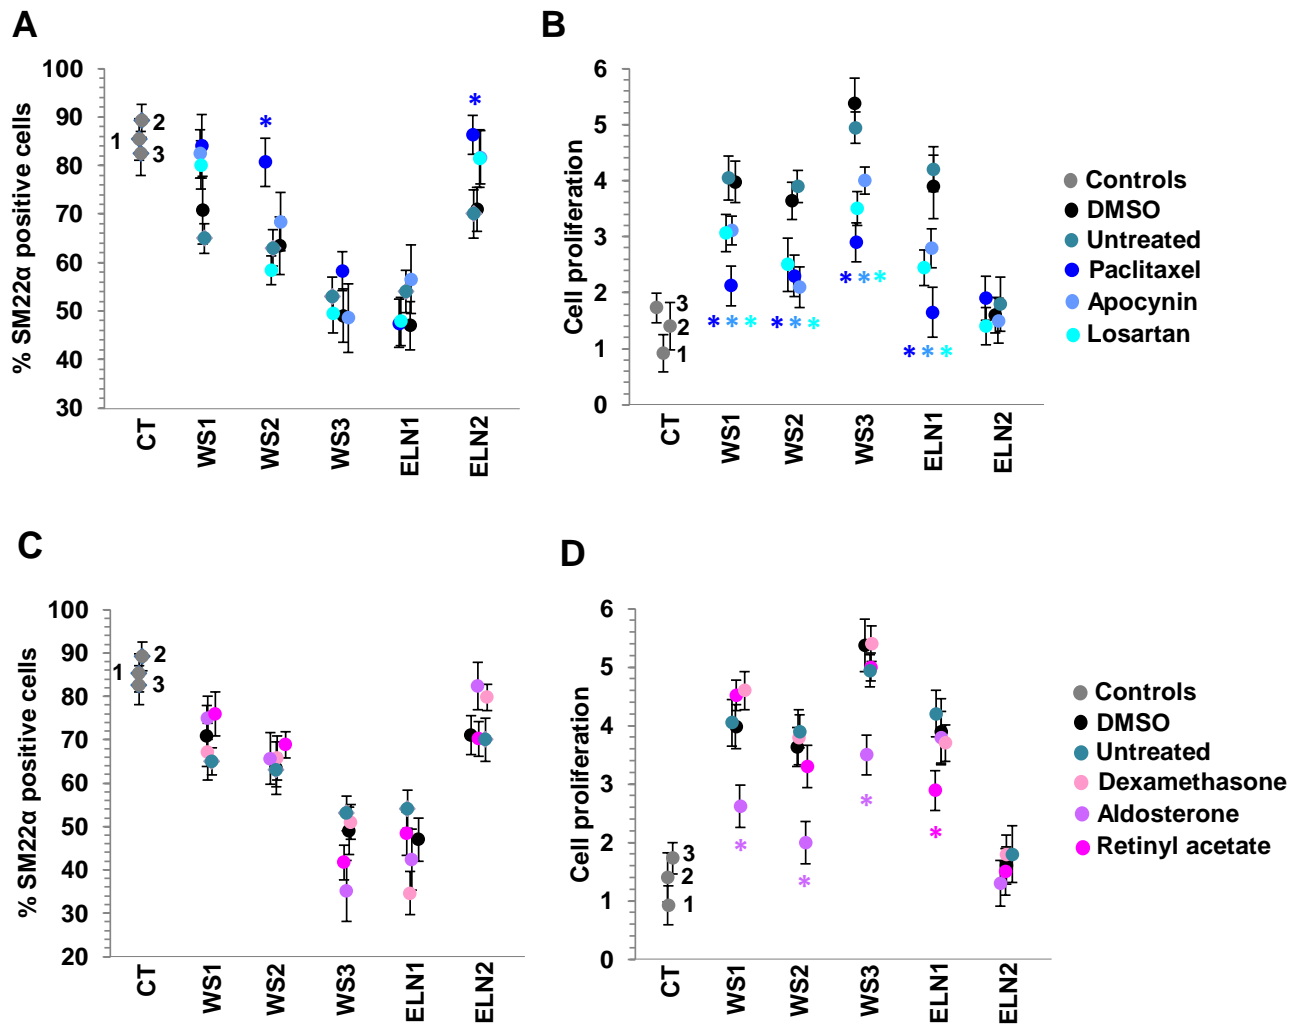

**Figure IV. Effect of anti-proliferative and pro-elastogenic drugs on EI iPSC-SMC differentiation and proliferation.** (A) The percentage of SM22α positive cells was 50-70% SM22α (black circle) in DMSO treated EI iPSC-SMCs. SMC differentiation was significantly increased with paclitaxel only in WS2 SMCs (81% SM22α, bright blue circle); the other patient SMCs did not respond. None of the patient SMCs responded to apocynin or losartan. Wild-type control (CT1, CT2, and CT3) SMCs are shown in grey. (B): Paclitaxel, apocynin and losartan decreased cell proliferation in all WS and in ELN1 SMCs compared to DMSO treated SMCs although the levels were not consistently restored to control levels in all responders. ELN2 was not hyperproliferative at baseline, therefore no further improvement was seen. (C) SMC differentiation did not improve with dexamethasone, aldosterone and retinyl acetate treatment compared to DMSO treated SMCs. (D) Aldosterone (purple circle) reduced proliferation in all 3 WS patient SMCs compared to DMSO treated SMCs although the levels were not consistently restored to control levels in all responders. Retinyl acetate reduced hyperproliferation only in ELN1 SMCs (pink circle) (n=3 biological replicates, n=3 technical replicates for each experiment) p<0.05, drug-treatment vs DMSO. ELN, elastin; SMC, smooth muscle cells; SM22α, smooth muscle marker 22α; DMSO, Dimethyl sulfoxide; WS, Williams syndrome.

Kinnear et al. Everolimus rescues the phenotype of elastin insufficiency in patient iPSC-derived vascular smooth muscle cells

**Table I. Short tandem repeat analyses in WS and elastin variant iPSCs in comparison to parental fibroblasts.** Results showed the iPSCs have an identical profile to the corresponding parental fibroblasts.

| Cell line         | Allele   | WS2<br>iPSCs | WS2<br>Fibroblasts | WS3<br>iPSCs | WS3<br>Fibroblasts | ELN1<br>iPSCs | ELN1<br>Fibroblasts | ELN2<br>iPSCs | ELN2<br>Fibroblasts |
|-------------------|----------|--------------|--------------------|--------------|--------------------|---------------|---------------------|---------------|---------------------|
| <b>Amelogenin</b> | Allele 1 | X            | X                  | X            | X                  | X             | X                   | X             | X                   |
|                   | Allele 2 | Y            | Y                  | X            | X                  | Y             | Y                   | X             | X                   |
| <b>CSF1PO</b>     | Allele 1 | 12           | 12                 | 10           | 10                 | 11            | 11                  | 10            | 10                  |
|                   | Allele 2 | 13           | 13                 | 12           | 12                 | 11            | 11                  | 11            | 11                  |
| <b>D13S317</b>    | Allele 1 | 8            | 8                  | 11           | 11                 | 14            | 14                  | 11            | 11                  |
|                   | Allele 2 | 12           | 12                 | 13           | 13                 | 14            | 14                  | 12            | 12                  |
| <b>D16S539</b>    | Allele 1 | 10           | 10                 | 11           | 11                 | 11            | 11                  | 11            | 11                  |
|                   | Allele 2 | 12           | 12                 | 13           | 13                 | 12            | 12                  | 13            | 13                  |
| <b>D18S51</b>     | Allele 1 | 12           | 12                 | 10           | 10                 | 12            | 12                  | 12            | 12                  |
|                   | Allele 2 | 14           | 14                 | 14           | 14                 | 16            | 16                  | 14            | 14                  |
| <b>D19S433</b>    | Allele 1 | 12           | 12                 | 13           | 13                 | 13            | 13                  | 12            | 12                  |
|                   | Allele 2 | 14.2         | 14.2               | 15.2         | 15.2               | 18            | 18                  | 14            | 14                  |
| <b>D21S11</b>     | Allele 1 | 29           | 29                 | 31           | 31                 | 29            | 29                  | 29            | 29                  |
|                   | Allele 2 | 30           | 30                 | 31           | 31                 | 30            | 30                  | 30.2          | 30.2                |
| <b>D2S1338</b>    | Allele 1 | 17           | 17                 | 20           | 20                 | 20            | 20                  | 17            | 17                  |
|                   | Allele 2 | 18           | 18                 | 20           | 20                 | 20            | 20                  | 17            | 17                  |
| <b>D3S1358</b>    | Allele 1 | 15           | 15                 | 15           | 15                 | 14            | 14                  | 16            | 16                  |
|                   | Allele 2 | 16           | 16                 | 17           | 17                 | 16            | 16                  | 18            | 18                  |
| <b>D5S818</b>     | Allele 1 | 9            | 9                  | 11           | 11                 | 12            | 12                  | 11            | 11                  |
|                   | Allele 2 | 11           | 11                 | 13           | 13                 | 13            | 13                  | 12            | 12                  |
| <b>D7S820</b>     | Allele 1 | 11           | 11                 | 10           | 10                 | 10            | 10                  | 9             | 9                   |
|                   | Allele 2 | 11           | 11                 | 12           | 12                 | 10            | 10                  | 9             | 9                   |
| <b>D8S1179</b>    | Allele 1 | 14           | 14                 | 10           | 10                 | 11            | 11                  | 13            | 13                  |
|                   | Allele 2 | 14           | 14                 | 11           | 11                 | 14            | 14                  | 14            | 14                  |
| <b>FGA</b>        | Allele 1 | 22           | 22                 | 21           | 21                 | 20            | 20                  | 22            | 22                  |
|                   | Allele 2 | 23           | 23                 | 23           | 23                 | 24            | 24                  | 25            | 25                  |
| <b>THO1</b>       | Allele 1 | 6            | 6                  | 9            | 9                  | 8             | 8                   | 6             | 6                   |
|                   | Allele 2 | 9            | 9                  | 9.3          | 9.3                | 9.3           | 9.3                 | 6             | 6                   |
| <b>TPOX</b>       | Allele 1 | 9            | 9                  | 8            | 8                  | 10            | 10                  | 10            | 10                  |
|                   | Allele 2 | 9            | 9                  | 8            | 8                  | 11            | 11                  | 10            | 10                  |
| <b>vWA</b>        | Allele 1 | 16           | 16                 | 17           | 17                 | 17            | 17                  | 18            | 18                  |
|                   | Allele 2 | 18           | 18                 | 19           | 19                 | 18            | 18                  | 20            | 20                  |

WS, Williams syndrome; ELN, elastin

**Table II. Drug concentrations used for the candidate drug classes**

| <b>Drug class</b>        | <b>Drug</b>     | <b>Concentrations tested</b> | <b>Concentration selected</b> |
|--------------------------|-----------------|------------------------------|-------------------------------|
| mTOR inhibitors          | Rapamycin       | 10nM, 100nM, 500nM           | 100nM                         |
|                          | Everolimus      | 10nM, 100nM, 500nM           | 100nM                         |
|                          | Temsirolimus    | 10nM, 100nM, 500nM           | 100nM                         |
|                          | AZD8055         | 10nM, 100nM, 500nM           | 100nM                         |
| CCB inhibitors           | Verapamil       | 1µM, 5µM, 10µM               | 10µM                          |
|                          | Diltiazem       | 1µM, 5µM, 10µM               | 10µM                          |
|                          | Amlodipine      | 1µM, 5µM, 10µM               | 5µM                           |
| Anti-proliferative drugs | Paclitaxel      | 10nM, 50nM, 100nM            | 50nM                          |
|                          | Apocynin        | 1µM, 5µM, 10µM               | 5µM                           |
|                          | Losartan        | 1µM, 5µM, 10µM               | 1µM                           |
|                          | Fluvastatin     | 0.25µM, 0.5µM, 1µM           | Toxic                         |
| Pro-elastogenic drugs    | Dexamethasone   | 10nM, 50nM, 100nM            | 100nM                         |
|                          | Aldosterone     | 10nM, 50nM, 100nM            | 100nM                         |
|                          | Retinyl acetate | 100nM, 1µM, 10µM             | 1µM                           |

CCB, calcium channel blocker

**Table III. Phenotyping data of control and patient iPSC-SMCs and response of patient iPSC-SMCs to drugs.** This Table is available as a Supplemental Excel file.
